# Supplementary material for: Exosomal ACADM sensitizes gemcitabine-resistance through modulating fatty acid metabolism and ferroptosis in pancreatic cancer
Source: PubMed Central journal article supplement (PMC10463774; doi:10.1186/s12885-023-11239-w), 2023-08-23

Supplement Figure1: Uncropped gel images of western blot

Figure1D

CD63

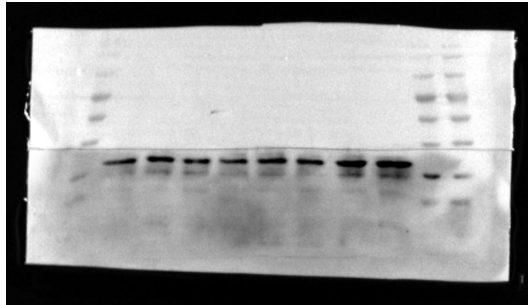

CD81

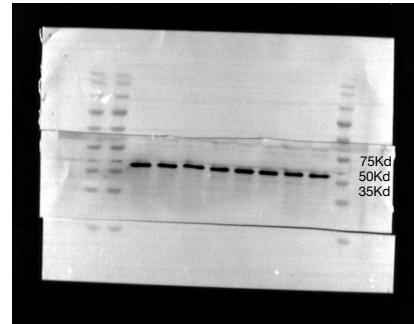

Figure2B and 2C

ACADM

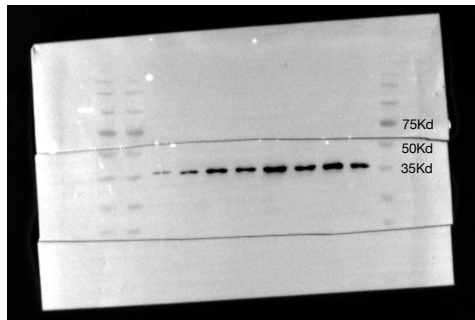

CD63

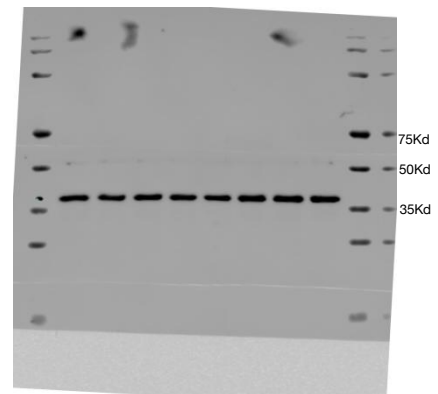

Figure2D and 2E

ACADM

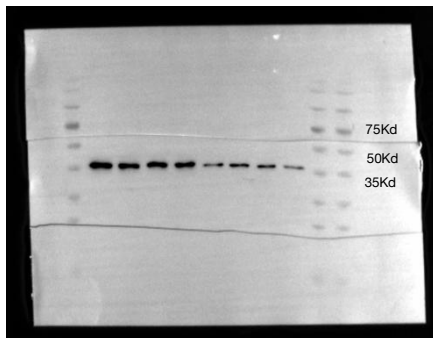

$\beta$ -actin

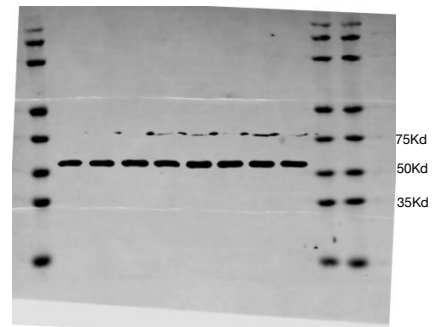

Figure5G

GPX4

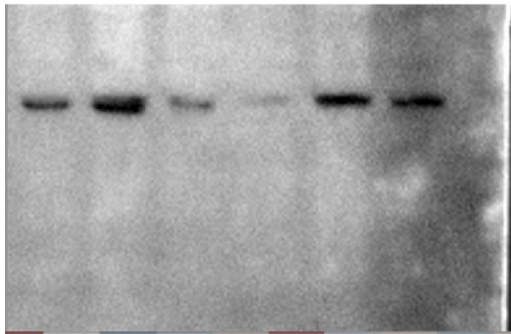

$\beta$ -actin

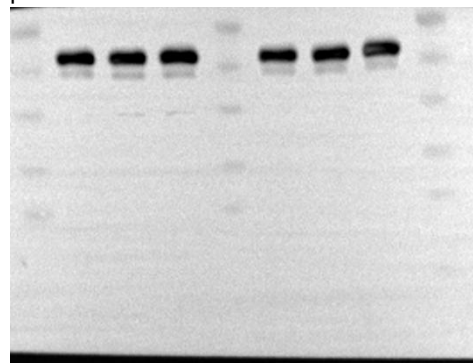

Figure7F

GPX4

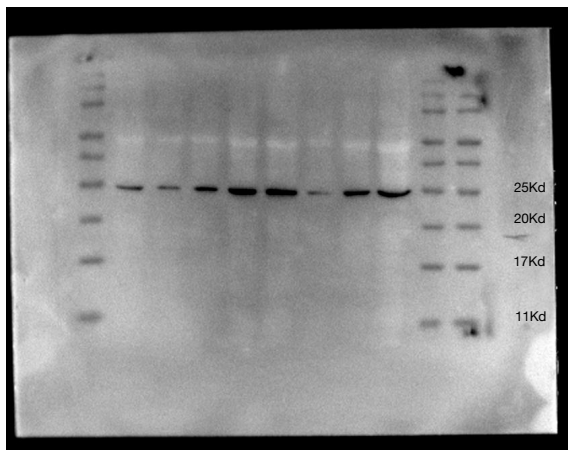

$\beta$  actin

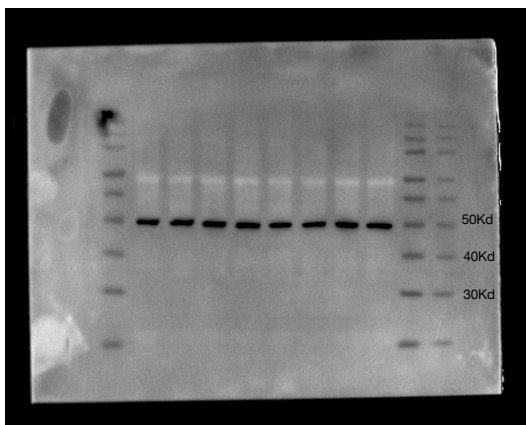

Supplement: 12885_2023_11239_MOESM2_ESM.pdf [file 12885_2023_11239_MOESM2_ESM.pdf]
